# Supplementary material for: Foliar Application of GA3 Stimulates Seed Production in Cauliflower
Source: MDPI journal article supplement (doi:10.3390/agronomy12061394), 2022-06-10
Supplement: s1 [file s1]

## Supplementary Tables

**Supplementary Table S1.** Air temperature, relative humidity and rainfall during October, 2017 to February, 2018

| Months        | Air temperature |       | Relative humidity (%) | Rainfall (mm) |
|---------------|-----------------|-------|-----------------------|---------------|
|               | (°C)            |       |                       |               |
|               | Max.            | Min.  |                       |               |
| October 2017  | 32.50           | 20.44 | 85.57                 | 80.08         |
| November 2017 | 28.57           | 17.40 | 74.97                 | 75.96         |
| December 2017 | 23.48           | 11.94 | 84.52                 | 0.00          |
| January 2018  | 23.97           | 10.26 | 84.06                 | 0.00          |
| February 2018 | 28.14           | 15.25 | 71.25                 | 9.74          |

Source: weather station, BSMRAU, Gazipur-1706, Bangladesh

**Supplementary Table S2.** Chemical composition of cow dung (composted)

| Nutrient (on dry matter basis) | Quantity      |
|--------------------------------|---------------|
| Organic matter                 | 85.27%        |
| Nitrogen                       | 1.85%         |
| Phosphorus                     | 1.18%         |
| Potassium                      | 0.57%         |
| Calcium                        | 0.71%         |
| Magnesium                      | 0.45%         |
| Zinc                           | 27.82 mg/kg   |
| Copper                         | 7.12 mg/kg    |
| Iron                           | 1278.35 mg/kg |
| Manganese                      | 114.32 mg/kg  |
